# Supplementary material for: Sponge exhalent metabolites influence coral reef picoplankton dynamics
Source: PubMed Central journal article supplement — Sci Rep. 2024 Dec 28;14:31394. doi: 10.1038/s41598-024-82995-3 (PMC11682114; doi:10.1038/s41598-024-82995-3), 2024-12-28
Supplement: 41598_2024_82995_MOESM2_ESM.pdf [file 41598_2024_82995_MOESM2_ESM.pdf]

## SUPPLEMENTARY CONSENSUS REFERENCE MATERIAL INFORMATION

### Sponge exhalent metabolites influence coral reef picoplankton dynamics

**Authors:** Reigel, Alicia M.<sup>a</sup>, Easson, Cole G.<sup>b</sup>, Fiore, Cara L.<sup>a</sup>, Apprill, Amy<sup>c</sup>

**Institutions:**

<sup>a</sup>Department of Biology, Appalachian State University

<sup>b</sup>Department of Biology, Middle Tennessee State University

<sup>c</sup>Marine Chemistry and Geochemistry, Woods Hole Oceanographic Institution

**Corresponding Author:**

Name: Alicia M. Reigel

Current Affiliation: Washington and Lee University

Mailing Address: 204 West Washington Street, Lexington, VA 24450

Email: areigel@wlu.edu

Phone: 540-458-8896

### Consensus Reference Material (CRM)

The Consensus Reference Material (CRM) for the Shimadzu TOC-L analyzer (used to obtain total organic carbon and total nitrogen concentrations) at Wood's Hole Oceanographic Institution is from the University of Miami's Consensus Reference Material program. The CRM for samples associated with this project is from Batch 19, Lot 03-19. Each day of analysis the CRM is injected three times through out the run. The sheet titled "CRM Values" contains the the values for the CRM that was run during processing of these samples. In the spreadsheet the first run is labeled 'DSRW\_Batch19\_Lot03-19', the subsequent runs for each day are labeled DSRW\_2 and DSRW\_3, sometimes there is a fourth run called DSRW\_end.

### Instrument Calibration Details

The instrument is calibrated daily with stock solutions made from potassium hydrogen phthalate and potassium nitrate. The stock solution is diluted to make a five point standard curve. The coefficient of variability between replicate injections is <2%.

| Date run | filename              | NPOC( $\mu$ M) | TN( $\mu$ M) |
|----------|-----------------------|----------------|--------------|
| 4/9/21   | DSRW_Batch19_Lot03-19 | 42.76          | 33.13        |
| 4/9/21   | DSRW_2                | 43.35          | 33.04        |
| 4/9/21   | DSRW_3                | 43.60          | 32.89        |
| 4/9/21   | DSRW_4                | 45.16          | 32.70        |
| 4/10/21  | DSRW_Batch19_Lot03-19 | 44.12          | 34.26        |
| 4/10/21  | DSRW_2                | 42.92          | 32.86        |
| 4/10/21  | DSRW_3                | 44.10          | 32.46        |
| 4/13/21  | DSRW_Batch19_Lot03-19 | 42.20          | 31.47        |
| 4/13/21  | DSRW_2                | 43.18          | 33.05        |
| 4/13/21  | DSRW_3                | 45.77          | 32.44        |
| 4/14/21  | DSRW_Batch19_Lot03-19 | 43.38          | 31.89        |
| 4/14/21  | DSRW_3                | 44.19          | 33.20        |
| 4/14/21  | DSRW_4                | 43.58          | 33.73        |
| 4/15/21  | DSRW_Batch19_Lot03-19 | 42.77          | 34.27        |
| 4/15/21  | DSRW_2                | 42.59          | 32.62        |
| 4/15/21  | DSRW_3                | 43.90          | 32.59        |
| 4/15/21  | DSRW_4                | 45.60          | 32.27        |
| 4/22/21  | DSRW_Batch19_Lot03-19 | 41.92          | 31.96        |
| 4/22/21  | DSRW_2                | 43.32          | 33.57        |
| 4/22/21  | DSRW_3                | 44.45          | 31.88        |
| 4/22/21  | DSRW_4                | 45.16          | 34.35        |
| 4/26/21  | DSRW_Batch19_Lot03-19 | 46.13          | 32.58        |
| 4/26/21  | DSRW_2                | 44.96          | 33.12        |
| 4/26/21  | DSRW_3                | 46.80          | 35.51        |
| 4/26/21  | DSRW_end              | 45.20          | 36.44        |
| 4/27/21  | DSRW_Batch19_Lot03-19 | 42.87          | 32.61        |
| 4/27/21  | DSRW_2                | 45.74          | 33.25        |
| 4/27/21  | DSRW_3                | 42.29          | 33.06        |
| 4/27/21  | DSRW_end              | 43.96          | 32.84        |
| 4/28/21  | DSRW_Batch19_Lot03-19 | 44.42          | 34.07        |
| 4/28/21  | DSRW_2                | 43.01          | 31.81        |
| 5/8/21   | DSRW_Batch19_Lot03-19 | 42.92          | 32.56        |
| 5/8/21   | DSRW_2                | 44.42          | 33.35        |
| 5/8/21   | DSRW_end              | 43.81          | 32.91        |
| 5/10/21  | DSRW_Batch19_Lot03-19 | 43.10          | 32.89        |
| 5/10/21  | DSRW_2                | 44.33          | 32.78        |
| 5/10/21  | DSRW_3                | 44.32          | 33.09        |
